# Supplementary material
Source: ML conference proceedings conference paper supplement (https://proceedings.neurips.cc/paper_files/paper/2019/hash/d2ed45a52bc0edfa11c2064e9edee8bf-Abstract.html)
Supplement: Supplementary file [file d2ed45a52bc0edfa11c2064e9edee8bf-Supplemental.zip]

---

# Supplementary material:

## *ResNets Ensemble via the Feynman-Kac Formalism to Improve Natural and Robust Accuracies*

---

**Bao Wang**

Department of Mathematics  
University of California, Los Angeles  
wangbaonj@gmail.com

**Binjie Yuan**

School of Aerospace  
Tsinghua University  
ybj14@mail.tsinghua.edu.cn

**Zuoqiang Shi**

Department of Mathematics  
Tsinghua University  
zqshi@mail.tsinghua.edu.cn

**Stanley J. Osher**

Department of Mathematics  
University of California, Los Angeles  
sjo@math.ucla.edu

### 1 Feynman-Kac Formula Representation of the Convection-Diffusion Equation's Solution

In this section, we will give a detailed discussion of using the Feynman-Kac formula to present the solution of the convection-diffusion equation.

**Lemma 1** (Feynman-Kac formula). ([1]) *Consider the partial differential equation*

$$\frac{\partial u}{\partial t}(\mathbf{x}, t) + \mu(x, t) \frac{\partial u}{\partial \mathbf{x}}(\mathbf{x}, t) + \frac{1}{2} \sigma^2(\mathbf{x}, t) \frac{\partial^2 u}{\partial \mathbf{x}^2}(\mathbf{x}, t) - V(\mathbf{x}, t) u(\mathbf{x}, t) + f(\mathbf{x}, t) = 0,$$

*defined for all  $\mathbf{x} \in \mathbb{R}^d$  and  $t \in [0, T]$ , subject to the terminal condition*

$$u(\mathbf{x}, T) = \psi(\mathbf{x}),$$

*where  $\mu, \sigma, \psi, V, f$  are known functions,  $T$  is a parameter and  $u : \mathbb{R}^d \times [0, T] \rightarrow \mathbb{R}$  is the unknown. Then the Feynman-Kac formula tells us that the solution can be written as a conditional expectation*

$$u(\mathbf{x}, t) = \mathbb{E} \left[ \int_t^T e^{-\int_t^\tau V(X_\tau, \tau) d\tau} f(X_\tau, \tau) d\tau + e^{-\int_t^T V(X_\tau, \tau) d\tau} \psi(X_T) | X_t = \mathbf{x} \right] \quad (1)$$

*where  $X(t)$  is an Itô process,*

$$dX = \mu(X, t)dt + \sigma(X, t)dB_t,$$

*with  $B_t$  is a Wiener process, or Brownian motion.*

Now, we consider using the Feynman-Kac formula to represent the solution of the following convection-diffusion equation which is used to model the ResNet

$$\begin{cases} \frac{\partial u}{\partial t}(\mathbf{x}, t) + \bar{F}(\mathbf{x}, \mathbf{w}(t)) \cdot \nabla u(\mathbf{x}, t) + \frac{1}{2} \sigma^2 \Delta u(\mathbf{x}, t) = 0, & \mathbf{x} \in \mathbb{R}^d, \quad t \in [0, 1), \\ u(\mathbf{x}, 1) = f(\mathbf{x}). \end{cases} \quad (2)$$

Let  $t = 0$ ,  $V(\mathbf{x}, t) = 0$ ,  $f(\mathbf{x}, t) = 0$ , and  $\psi(\mathbf{x}) = f(\mathbf{x})$ , we get the solution of Eq. (2) at  $t = 0$ , represented by the Feynman-Kac formula, as

$$u(\hat{\mathbf{x}}, 0) = \mathbb{E}[f(\mathbf{x}(1)) | \mathbf{x}(0) = \hat{\mathbf{x}}], \quad (3)$$

where  $\mathbf{x}(t)$  is an Itô process,

$$d\mathbf{x}(t) = \bar{F}(\mathbf{x}(t), \mathbf{w}(t))dt + \sigma dB_t,$$

and  $u(\hat{\mathbf{x}}, 0)$  is the conditional expectation of  $f(\mathbf{x}(1))$ .

## References

- [1] M. Kac. On distributions of certain Wiener functionals. *Transactions of the American Mathematical Society*, 65:1–13, 1949.
